# Supplementary material
Source: publisher figshare collection journal article supplement (https://acs.figshare.com/ndownloader/files/14545928)
Supplement: Supplementary file 1 [file 14545928]

# Supporting Information:

## Quasi-Ballistic Thermal Transport Across MoS<sub>2</sub>

### Thin Films

*Aditya Sood*<sup>1,2,†,‡,\*</sup>, *Feng Xiong*<sup>3,‡</sup>, *Shunda Chen*<sup>4</sup>, *Ramez Cheaito*<sup>2</sup>, *Feifei Lian*<sup>1,¶</sup>, *Mehdi Asheghi*<sup>2</sup>, *Yi Cui*<sup>5,6</sup>, *Davide Donadio*<sup>4,7</sup>, *Kenneth E. Goodson*<sup>2,5</sup>, *Eric Pop*<sup>1,5,8,\*</sup>

<sup>1</sup>Department of Electrical Engineering, Stanford University, Stanford, CA 94305, USA. <sup>2</sup>Department of Mechanical Engineering, Stanford University, Stanford, CA 94305, USA. <sup>3</sup>Department of Electrical and Computer Engineering, University of Pittsburgh, Pittsburgh, PA 15261, USA. <sup>4</sup>Department of Chemistry, University of California, Davis, CA 95616, USA. <sup>5</sup>Department of Materials Science and Engineering, Stanford University, Stanford, CA 94305, USA. <sup>6</sup>Stanford Institute for Materials and Energy Sciences, SLAC National Accelerator Laboratory, Menlo Park, CA 94025, USA. <sup>7</sup>Ikerbasque, Basque Foundation for Science, E-48011 Bilbao, Spain. <sup>8</sup>Precourt Institute for Energy, Stanford University, Stanford, CA 94305, USA. <sup>†</sup>Present address: Stanford Institute for Materials and Energy Sciences, SLAC National Accelerator Laboratory, Menlo Park, CA 94025, USA. <sup>¶</sup>Present address: NG Next Basic Research Laboratory, Northrop Grumman Corporation, Redondo Beach, CA 90278, USA. <sup>‡</sup>Equal contribution.

\*Corresponding authors: [aditsood@alumni.stanford.edu](mailto:aditsood@alumni.stanford.edu), [epop@stanford.edu](mailto:epop@stanford.edu)

## 1. TDTR sensitivity analysis

To determine TDTR measurement sensitivity to the different parameters of interest, we calculate the sensitivity coefficients  $S_\alpha$  as follows:

$$S_\alpha = \frac{\partial \log(\text{Signal})}{\partial \log(\alpha)}$$

where *signal* could either refer to the normalized *in-phase voltage* ( $V_{\text{in}}$ ) or the *ratio* ( $= -V_{\text{in}}/V_{\text{out}}$ ), and the parameter  $\alpha$  could be the cross-plane thermal conductivity  $\kappa_z$ , the Al/MoS<sub>2</sub> thermal boundary conductance (TBC)  $G_1$ , or the MoS<sub>2</sub>/SiO<sub>2</sub> TBC  $G_2$ . These are plotted in Figure S1 for a 20 nm thick film (a, b), and a 200 nm thick film (c, d).

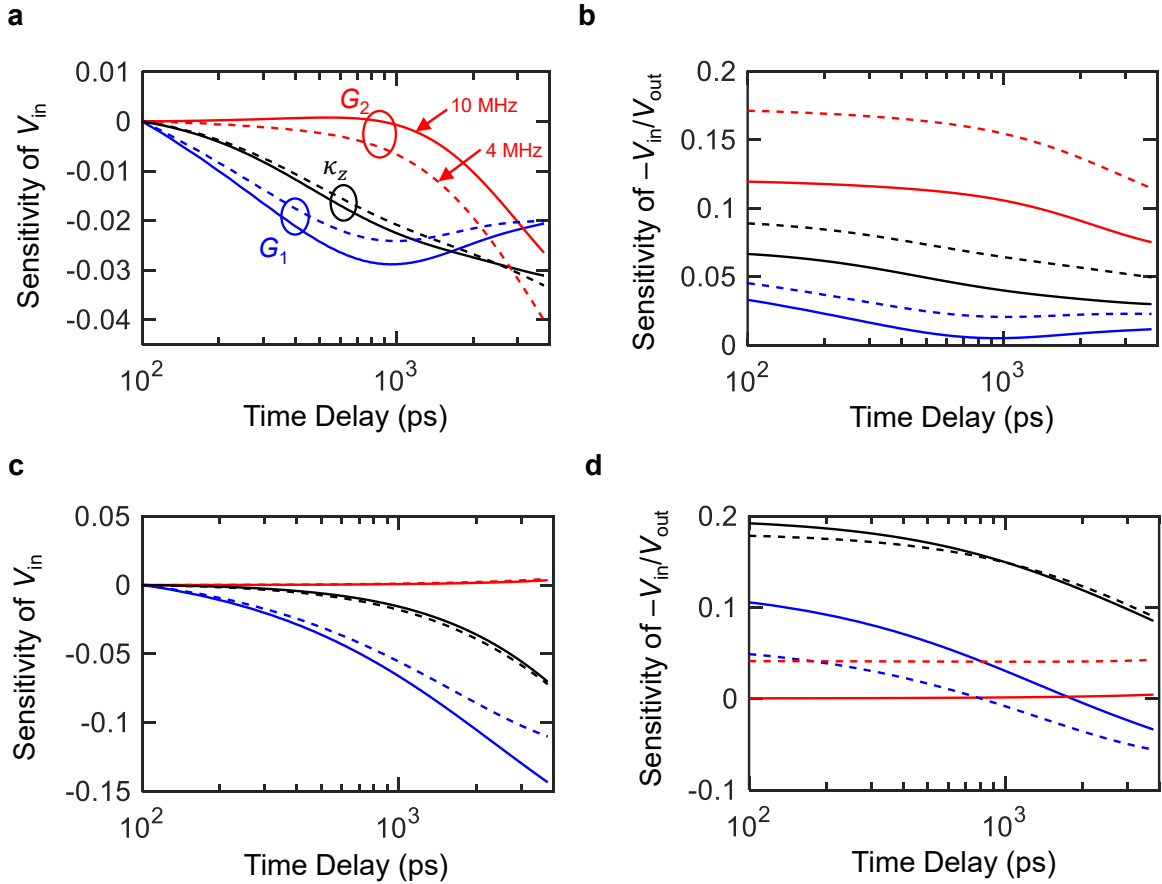

**Figure S1.** Sensitivity coefficients plotted for (a),(b):  $t = 20$  nm,  $G_1 = 70 \text{ MWm}^{-2}\text{K}^{-1}$ ,  $G_2 = 25 \text{ MWm}^{-2}\text{K}^{-1}$ ,  $\kappa_z = 0.9 \text{ Wm}^{-1}\text{K}^{-1}$ , and (c),(d):  $t = 200$  nm,  $G_1 = 34 \text{ MWm}^{-2}\text{K}^{-1}$ ,  $G_2 = 21 \text{ MWm}^{-2}\text{K}^{-1}$ ,  $\kappa_z = 2 \text{ Wm}^{-1}\text{K}^{-1}$ . Legend: black ( $\kappa_z$ ), blue ( $G_1$ ), red ( $G_2$ ). Solid lines (10 MHz), dashed lines (4 MHz).

## 2. Thermal boundary conductance (TBC) measurements

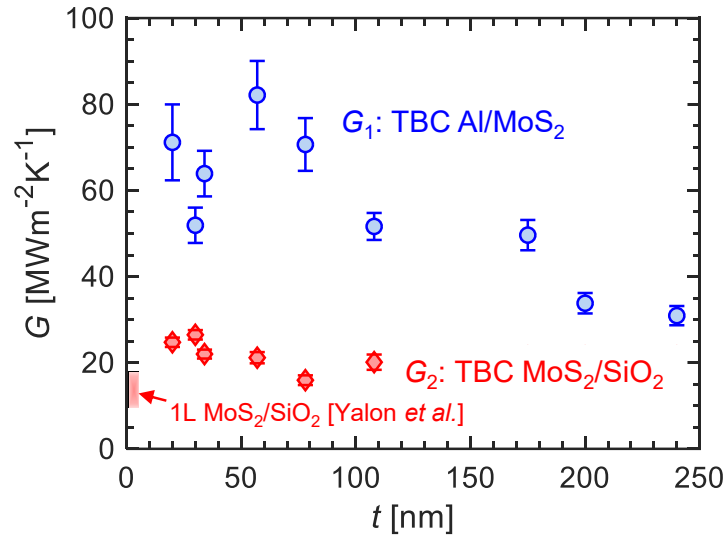

**Figure S2.** Al/MoS<sub>2</sub> ( $G_1$ ) and MoS<sub>2</sub>/SiO<sub>2</sub> ( $G_2$ ) TBCs plotted versus film thickness  $t$ , shown by the blue circles and red diamonds, respectively. Also shown for comparison are TBC measurements between monolayer MoS<sub>2</sub> and SiO<sub>2</sub> obtained by Raman thermometry<sup>1,2</sup> (red shaded region represents the error bars of the reported result).

### 3. Thermal penetration depth calculations

To calculate the thermal penetration depth ( $d_p$ ) in the TDTR measurements, we solve the full 3D heat diffusion equation in the multilayer stack. This is solved in the frequency domain under a sinusoidal heat flux excitation using methods described elsewhere<sup>3,4</sup>. We compute the amplitude of temperature oscillations  $\Delta T(r, z)$  at the modulation frequency  $f_{\text{mod}}$ ;  $d_p$  is the distance from the top surface at which  $\Delta T(r, z)$  is reduced to  $1/e$  of its maximum value.

Figure S3(a) shows  $\Delta T(r, z)$  within a 300 nm thick MoS<sub>2</sub> film – this case is representative of one of the thick samples measured in our study (for which  $\kappa_z \sim 2 \text{ Wm}^{-1}\text{K}^{-1}$ ). The simulation is carried out on a multilayer stack of Al/MoS<sub>2</sub>/SiO<sub>2</sub>/Si using a 4-layer model. The thermal properties of the various layers are provided in the main text. The TBCs of the Al/MoS<sub>2</sub> and MoS<sub>2</sub>/SiO<sub>2</sub> interfaces are  $40 \text{ MWm}^{-2}\text{K}^{-1}$  and  $20 \text{ MWm}^{-2}\text{K}^{-1}$  respectively, although these do not affect  $d_p$  significantly. The heat flux is modulated at  $f_{\text{mod}} = 4 \text{ MHz}$ , since this is the frequency at which we extract  $\kappa_z$ . Note that  $d_p$  is affected both by  $f_{\text{mod}}$  and the laser spot diameter ( $w_0$ ); in these simulations,  $w_0 = 3 \text{ }\mu\text{m}$ . Figure S3(b) plots  $\Delta T(z)$  at  $r = 0$ . From this we estimate  $d_p \approx 160 \text{ nm}$ .

The same procedure is used to calculate  $d_p$  for the bulk samples measured in previous studies<sup>5–7</sup> using a 2-layer model (Al/MoS<sub>2</sub>). In each case, the simulations are performed using the reported  $\kappa_z$ ,  $f_{\text{mod}}$  and  $w_0$  values. A representative calculation<sup>5</sup> is shown in Figures S3(c),(d).

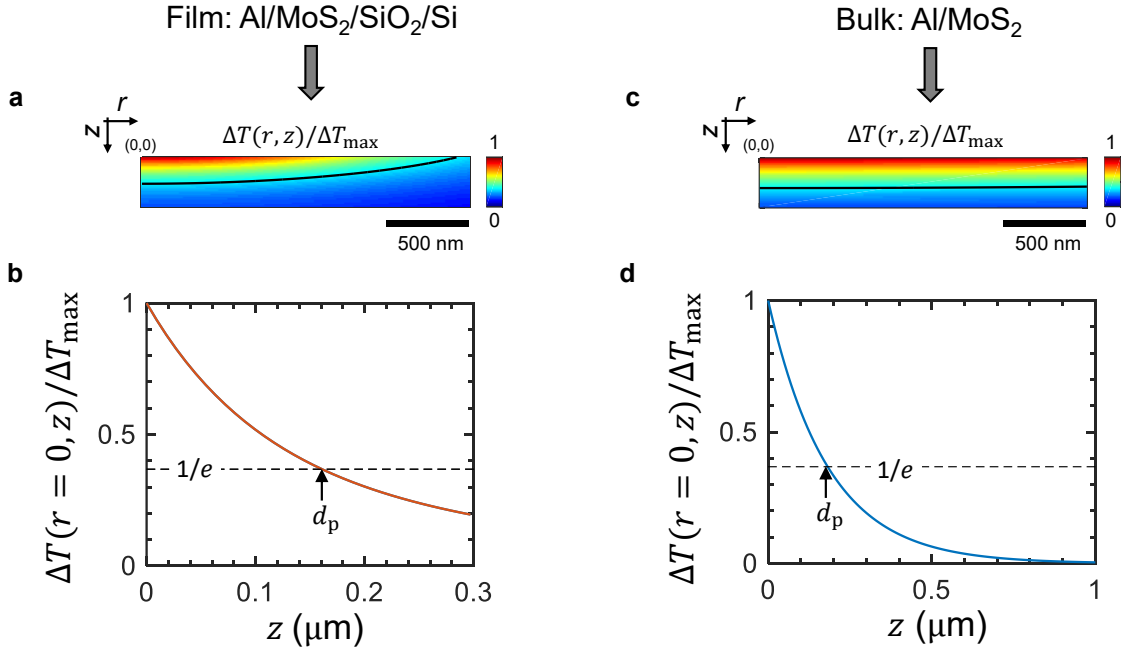

**Figure S3.** (a) Normalized amplitude of temperature oscillations in a 300 nm thick MoS<sub>2</sub> film with  $\kappa_z = 2 \text{ Wm}^{-1}\text{K}^{-1}$ ,  $f_{\text{mod}} = 4 \text{ MHz}$ ,  $w_0 = 3 \mu\text{m}$ . The film is part of a multilayer stack: Al/MoS<sub>2</sub>/SiO<sub>2</sub>/Si, representative of the samples measured in this study. (b) Line-out along  $r = 0$ , with the dashed line indicating a  $1/e$  thermal penetration depth of  $d_p \approx 160$  nm. (c) Normalized amplitude of temperature oscillations in a bulk MoS<sub>2</sub> substrate<sup>5</sup> with  $\kappa_z = 2 \text{ Wm}^{-1}\text{K}^{-1}$ ,  $f_{\text{mod}} = 9.8 \text{ MHz}$ ,  $w_0 = 24 \mu\text{m}$ . (d) Line-out along  $r = 0$ , indicating  $d_p \approx 180$  nm.

#### 4. Phonon wavelength contributions to thermal conductivity

We use DFT calculations to determine the range of phonon wavelengths that contribute to thermal transport along the  $c$ -axis. Figure S4 shows the thermal conductivity accumulation function plotted versus wavelength at 300 K. Based on this, the median wavelength is  $\lambda \sim 1.5$  nm. If we posit that the MoS<sub>2</sub> film must have a thickness of at least  $\sim 3\lambda$  in order to have a ‘3D’ phonon dispersion, we estimate a minimum thickness of  $\sim 5$  nm. For  $t < 5$  nm, more detailed calculations may be needed to understand the effect of confinement on phonon band structure and cross-plane thermal transport.

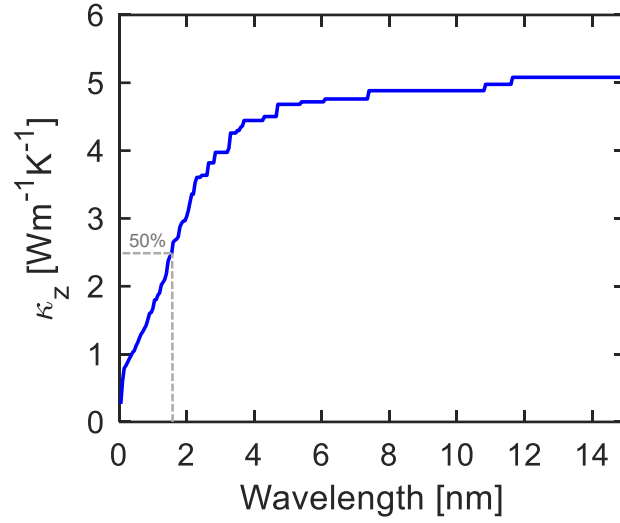

**Figure S4.** Calculated cumulative distribution function of the cross-plane thermal conductivity ( $\kappa_z$ ) versus phonon wavelength at 300 K.

## 5. Cross-plane thermal transport in thin-film graphite and few-layer graphene

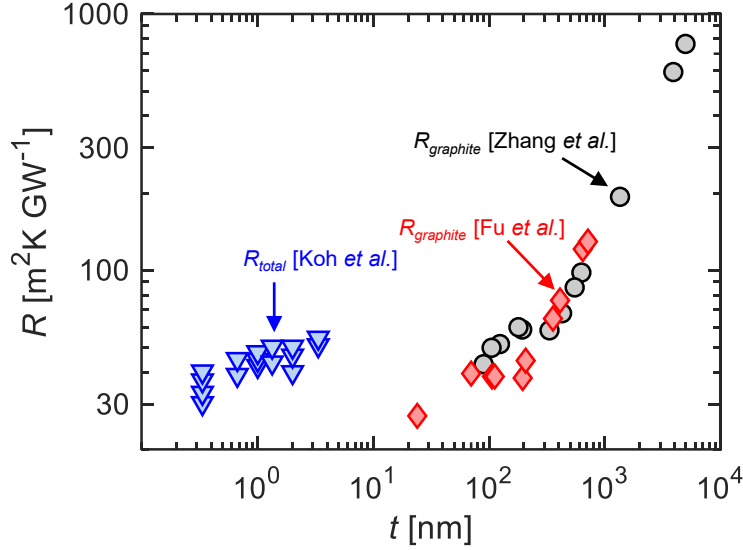

**Figure S5.** A summary of cross-plane thermal resistance measurements of crystalline graphite thin-films and few-layer graphene from literature. Intrinsic cross-plane thermal resistance measurements are from Zhang *et al.*<sup>8</sup> ( $90 \text{ nm} < t < 5 \text{ } \mu\text{m}$ ), shown in black circles, and Fu *et al.*<sup>9</sup> ( $24 \text{ nm} < t < 714 \text{ nm}$ ), shown in red diamonds. The intrinsic resistance is defined as  $R_{\text{graphite}} = t/\kappa_z$ . For the case of Fu *et al.*<sup>9</sup> this is calculated by subtracting out the estimated interface contribution. Total cross-plane thermal resistance measurements of Au/Ti/few-layer-graphene/SiO<sub>2</sub> interfaces for  $0.3 < t < 3 \text{ nm}$  are from Koh *et al.*<sup>10</sup>, shown as blue triangles; the total resistance including the interfacial contribution is  $R_{\text{total}} = R_{\text{n-graphene}} + R_{\text{interfaces}}$ . The plateau in intrinsic thermal resistance in Zhang *et al.*<sup>8</sup> and Fu *et al.*<sup>9</sup> could be related to the onset of quasi-ballistic thermal transport. A comparison to the total thermal resistance values for few-layer-graphene by Koh *et al.*<sup>10</sup> suggests that a contributing factor to the thickness-independent  $R_{\text{total}}$  could be the strongly-ballistic transport of thermal phonons propagating along the *c*-axis of the thin-films.

## References

- (1) Yalon, E.; McClellan, C. J.; Smithe, K. K. H.; Xu, R. L.; Rojo, M. M.; Suryavanshi, S. V.; Gabourie, A. J.; Neumann, C. M.; Xiong, F.; Pop, E. Energy Dissipation in Monolayer MoS<sub>2</sub> Electronics. *Nano Lett.* **2017**, *17* (6), 3429–3433.
- (2) Yalon, E.; Aslan, Ö. B.; Smithe, K. K. H.; McClellan, C. J.; Suryavanshi, S. V.; Xiong, F.; Sood, A.; Neumann, C. M.; Xu, X.; Goodson, K. E.; Heinz, T. F.; Pop, E. Temperature-Dependent Thermal Boundary Conductance of Monolayer MoS<sub>2</sub> by Raman Thermometry. *ACS Appl. Mater. Interfaces* **2017**, *9* (49), 43013–43020.
- (3) Cahill, D. G. Analysis of Heat Flow in Layered Structures for Time-Domain Thermoreflectance. *Rev. Sci. Instrum.* **2004**, *75* (12), 5119–5122.
- (4) Braun, J. L.; Hopkins, P. E. Upper Limit to the Thermal Penetration Depth during Modulated Heating of Multilayer Thin Films with Pulsed and Continuous Wave Lasers: A Numerical Study. *J. Appl. Phys.* **2017**, *121*, 175107.
- (5) Liu, J.; Choi, G. M.; Cahill, D. G. Measurement of the Anisotropic Thermal Conductivity of Molybdenum Disulfide by the Time-Resolved Magneto-Optic Kerr Effect. *J. Appl. Phys.* **2014**, *116*, 233107.
- (6) Jiang, P.; Qian, X.; Gu, X.; Yang, R. Probing Anisotropic Thermal Conductivity of Transition Metal Dichalcogenides MX<sub>2</sub> (M = Mo, W and X = S, Se) Using Time-Domain Thermoreflectance. *Adv. Mater.* **2017**, *29* (36), 1701068.
- (7) Muratore, C.; Varshney, V.; Gengler, J. J.; Hu, J. J.; Bultman, J. E.; Smith, T. M.; Shamberger, P. J.; Qiu, B.; Ruan, X.; Roy, A. K.; Voevodin, A. A. Cross-Plane Thermal Properties of Transition Metal Dichalcogenides. *Appl. Phys. Lett.* **2013**, *102*, 081604.
- (8) Zhang, H.; Chen, X.; Jho, Y. D.; Minnich, A. J. Temperature-Dependent Mean Free Path



- Spectra of Thermal Phonons along the  $c$ -Axis of Graphite. *Nano Lett.* **2016**, *16* (3), 1643–1649.
- (9) Fu, Q.; Yang, J.; Chen, Y.; Li, D.; Xu, D. Experimental Evidence of Very Long Intrinsic Phonon Mean Free Path along the  $c$ -Axis of Graphite. *Appl. Phys. Lett.* **2015**, *106*, 031905.
- (10) Koh, Y. K.; Bae, M. H.; Cahill, D. G.; Pop, E. Heat Conduction across Monolayer and Few-Layer Graphenes. *Nano Lett.* **2010**, *10* (11), 4363–4368.
